# Supplementary material for: Combination of Irreversible Electroporation and STING Agonist for Effective Cancer Immunotherapy
Source: PubMed Central journal article supplement (PMC7693597; doi:10.3390/cancers12113123), 2020-10-26
Supplement: cancers-12-03123-s001.pdf [file cancers-12-03123-s001.pdf]

## Combination of Irreversible Electroporation and STING Agonist for Effective Cancer Immunotherapy

Eun-Jin Go, Hannah Yang, Hong Jae Chon, DaSom Yang, WonHyoung Ryu, Dong-Hyun Kim, Dong Keun Han, Chan Kim and Wooram Park

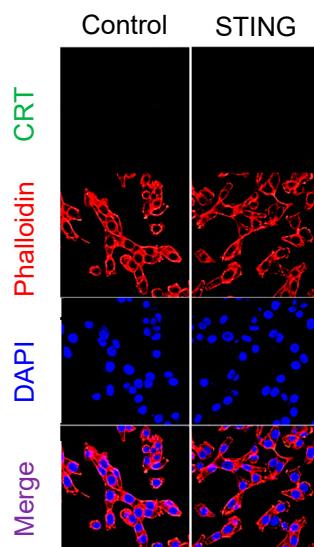

**Figure S1.** Expression of calreticulin (CRT) on the surface of LLC after STING agonist (RR-CDA) treatment. STING agonist was treated at a concentration of 10  $\mu\text{g}/\text{mL}$ . Confocal microscopy images were obtained 24 h after the STING agonist treatment.

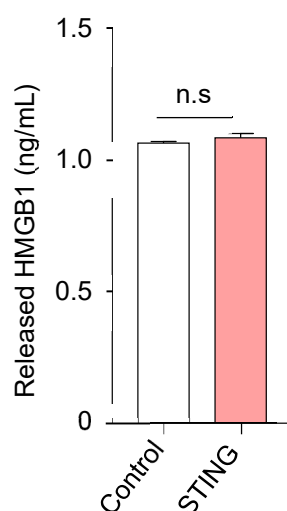

**Figure S2.** Quantitative analysis of HMGB1 released from LLC after STING agonist (RR-CDA) treatment. To measure the amount of released HMGB1, LLC cells were treated with STING agonist (10  $\mu\text{g}/\text{mL}$ ) in 24 well plates for 24 h. The released HMGB1 was quantified using ELISA at 450 nm.
